# Supplementary material for: De Novo Genome Assembly Shows Genome Wide Similarity between Trypanosoma brucei brucei and Trypanosoma brucei rhodesiense
Source: PubMed Central journal article supplement (PMC4766357; doi:10.1371/journal.pone.0147660), 2016-02-24

**A**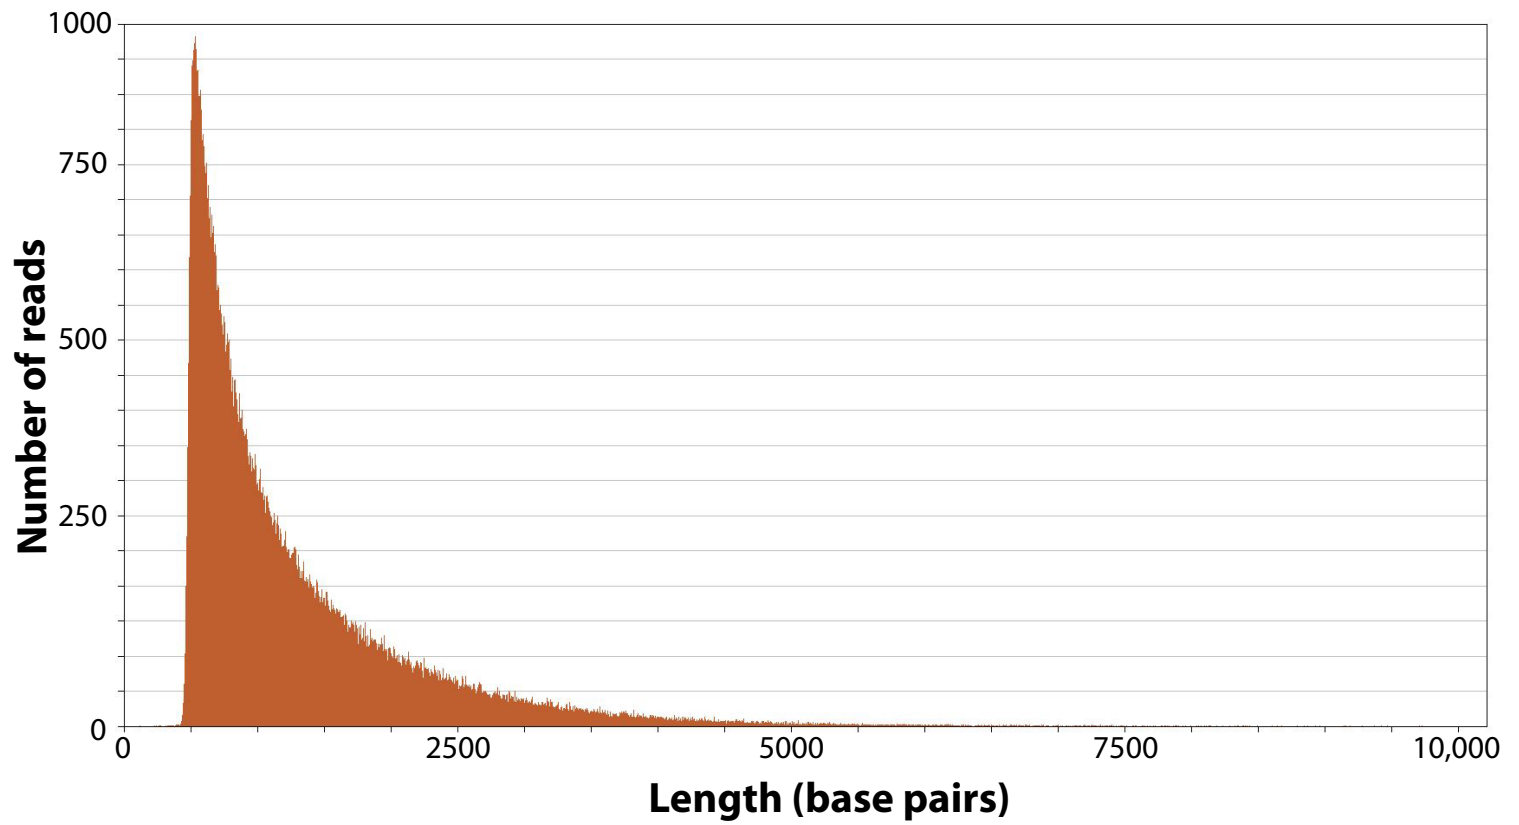**B**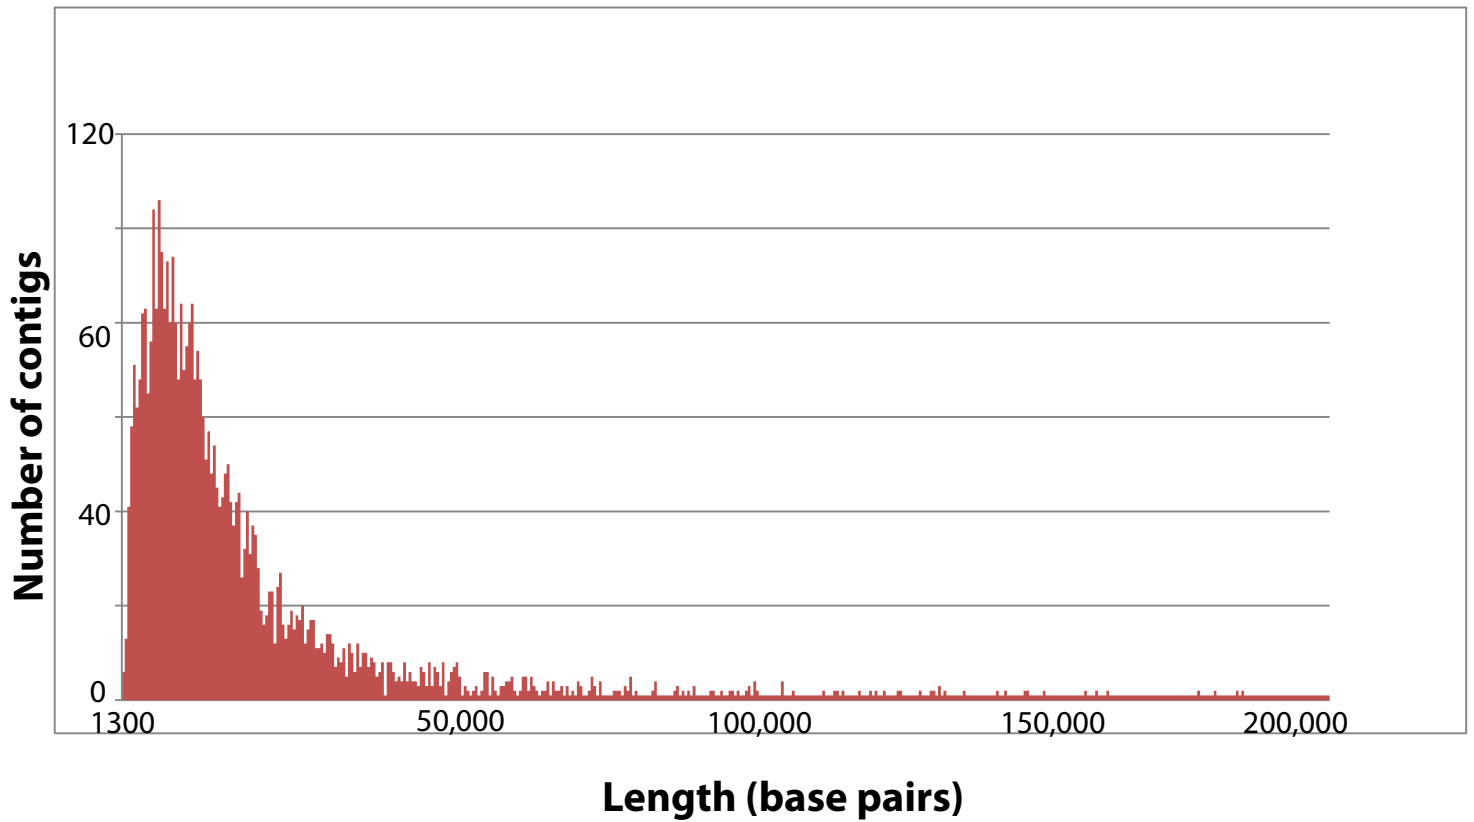

Supplement: pone.0147660.s005.pdf [file pone.0147660.s005.pdf]
